# Supplementary material
Source: publisher figshare collection journal article supplement (https://gsapubs.figshare.com/ndownloader/files/25688087)
Supplement: Supplementary file 1 [file 25688087]

## Sheet: Sheet1
#	Hotspot	Lat	Long
		(˚N)	(˚E)
1	Chatham	-44.03	-176.43												Count	Long bin
2	Samoa	-14.5	-168.2												5	-180
3	Hawaii	18.92	-155.27												9	-150
4	Maria	-20.2	-153.8												9	-120
5	Arago	-23.4	-150.7												3	-90
6	Society	-18.2	-148.4												2	-60
7	North Austral	-25.6	-143.3												13	-30
8	Louisville	-53.6	-140.6												9	0
9	MacDonald	-29	-140.3												6	30
10	Marquesas	-10.48	-138.63												4	60
11	Bowie	53	-134.8												3	90
12	Cobb	46	-130.1												1	120
13	Pitcairn	-25.4	-129.3												6	150
14	Anahim	52.9	-123.73												70
15	Shimada	16.87	-117.52
16	Foundation	-35.9	-116.04
17	Crough	-26.9	-114.6
18	Guadalupe	27.7	-114.5
19	Socorro	19	-111
20	Yellowstone	44.5	-110.4
21	Easter	-26.4	-106.5
22	Raton	36.8	-104.1
23	Galapagos	-0.37	-91.55
24	Juan Fernandez	-33.9	-81.8
25	San Felix	-26.29	-80.1
26	Bermuda	32.6	-64.3
27	Corner	35.39	-51.68
28	Fernando	-3.85	-32.42
29	New England	29.4	-29.2
30	Trindade	-20.5	-28.8
31	Azores	38.47	-28.4
32	Cape Verde	16	-24
33	Canary	28.2	-18
34	Iceland	64.4	-17.3
35	Madeira	32.65	-16.91
36	Ascension	-7.93	-14.42
37	Tristan	-37.2	-12.3
38	St Helena	-16.5	-9.5
39	Jan Mayen	70.98	-8.53
40	Discovery	-43	-2.7
41	Shona	-51.4	-1
42	Bouvet	-54.43	3.38
43	Cameroon	2	5.1
44	Hoggar	23.3	5.6
45	Eifel	50.39	6.87
46	Vema	-31.63	8.33
47	Gough	-40.3	10
48	Etna	37.76	15
49	Tibesti	20.8	17.5
50	Darfur	13	24.2
51	Marion	-46.9	37.6
52	Afar	7	39.5
53	Comoros	-11.5	43.3
54	Crozet	-46.1	50.2
55	Seychelles	-4.61667	55.45
56	Reunion	-21.2	55.7
57	Rodriguez	-19.72	63.42
58	Kerguelen	-49.6	69
59	Heard	-53.1	73.5
60	Amsterdam	-37.8258	77.5547
61	Cocos Keeling	-12.19	96.83
62	Christmas	-10.48	105.58
63	Hainan	18.92	109.73
64	East Australia	-40.8	146
65	Tasmanid	-40.4	155.5
66	Lord Howe	-31.55	159.9
67	Caroline	4.8	164.4
68	Balleny	-67.6	164.8
69	Erebus	-77.5	167.2
70	East of Solomon	-15.4	167.83

## Sheet: G48547
Wan, B., et al., 2021, Long-lived seamount subduction in ancient orogens: Evidence from the Paleozoic South Tianshan: Geology, v. 49, https://doi.org/10.1130/G48547.1
